# Supplementary material for: Application of Zone Model Predictive Control Artificial Pancreas During Extended Use of Infusion Set and Sensor: A Randomized Crossover-Controlled Home-Use Trial
Source: Oxford University Press journal article supplement (doi:10.2337/dc17-0500), 2017-06-05

# SUPPLEMENTARY DATA

**Supplementary Table 1.** Subject demographics and baseline characteristics (with units stated in parenthesis).

| Characteristic                           | Value       |
|------------------------------------------|-------------|
| <b>Cohort</b>                            | 19 (11F,8M) |
| <b>Age (yrs)</b>                         | 23.0 (10.0) |
| <b>Weight (kg)</b>                       | 86.1±22.8   |
| <b>BMI (kg/m<sup>2</sup>)</b>            | 28.2±6.0    |
| <b>Duration of diabetes (yrs)</b>        | 11.0 (11.8) |
| <b>Total daily insulin (TDD) (U)</b>     | 56.3±18.4   |
| <b>Total daily insulin per kg (U/kg)</b> | 0.67±0.19   |
| <b>HbA1c (%)</b>                         | 8.0±1.7     |
| <b>HbA1c (mmol/mol)</b>                  | 63.8±18.4   |

**Supplementary Table 2.** Non-responder subjects during the study. The differences ( $\Delta$ ) are calculated as Zone-MPC AP outcomes minus SAP outcomes. Subjects #2 to #6 had increased mean glucose during closed-loop (CL) while Subjects #1, #2, #4, #5 and #6 had decreased time in 70-180 mg/dL during CL. Non-responders had a baseline HbA1c that was slightly higher than that of responders (8.3±2.9 vs. 7.9±0.8%;  $p=0.43$ ) but mean SAP glucose that was slightly lower (147±20 vs. 160±11 mg/dL;  $p=0.18$ ), though neither difference was statistically significant.

| #        | Subject | Site | HbA1c | SAP<br>Mean<br>BG<br>(mg/dL) | SAP<br>%<br>time<br>in<br>70-<br>180 | SAP<br>%<br>time<br>< 70 | SAP<br>%<br>time<br>> 180 | $\Delta$ Mean<br>BG<br>(mg/dL) | $\Delta$ %<br>time<br>in<br>70-<br>180 | $\Delta$ %<br>time<br>< 70 | $\Delta$ %<br>time<br>> 180 | Percent<br>time<br>in CL |
|----------|---------|------|-------|------------------------------|--------------------------------------|--------------------------|---------------------------|--------------------------------|----------------------------------------|----------------------------|-----------------------------|--------------------------|
| <b>1</b> | 23007   | SU   | 8.2   | 165                          | 65.3                                 | 0.73                     | 33.95                     | -2.33                          | -0.35                                  | -0.44                      | 0.79                        | 93.9                     |
| <b>2</b> | 23009   | SU   | 8.0   | 143                          | 76.75                                | 2.60                     | 20.63                     | 6.08                           | -2.3                                   | -1.75                      | 4.05                        | 90.9                     |
| <b>3</b> | 23002   | SU   | 6.7   | 144                          | 69.44                                | 7.12                     | 23.43                     | 4.78                           | 0.89                                   | -3.91                      | 3                           | 87.5                     |
| <b>4</b> | 23004   | SU   | 6.3   | 131                          | 80.33                                | 5.59                     | 14                        | 23.68                          | -8.83                                  | -4.37                      | 13.21                       | 94.6                     |
| <b>5</b> | 23005   | SU   | 14.0  | 175                          | 54.46                                | 1.7                      | 43.83                     | 9.76                           | -3.9                                   | -0.75                      | 4.66                        | 80.5                     |
| <b>6</b> | 48806   | BDC  | 6.4   | 122                          | 88                                   | 3.79                     | 8.21                      | 17.39                          | -7.9                                   | -2.72                      | 10.63                       | 89.5                     |

# SUPPLEMENTARY DATA

**Supplementary Table 3.** Change ( $\Delta$ ) in glycemic metrics (Zone-MPC AP outcomes minus SAP outcomes) in the two sequences of the study: AP followed by SAP and SAP followed by AP. No period-specific differences were found for primary and secondary outcomes as assessed by rank-sum test. The data are shown as median (IQR).

| Metric                                 | AP followed by SAP (N=10) | SAP followed by AP (N=9) | p-value |
|----------------------------------------|---------------------------|--------------------------|---------|
| $\Delta$ %Time < 50 mg/dL              | -0.1 ( 0.3)               | -0.0 ( 0.2)              | 0.368   |
| $\Delta$ %Time < 60 mg/dL              | -0.7 ( 0.5)               | -0.3 ( 0.7)              | 0.356   |
| $\Delta$ %Time < 70 mg/dL              | -1.5 ( 1.0)               | -0.8 ( 2.1)              | 0.549   |
| $\Delta$ %Time in 70 - 140 mg/dL       | 6.0 ( 8.4)                | 8.1 ( 12.7)              | 0.905   |
| $\Delta$ %Time in 70 - 180 mg/dL       | 5.9 ( 12.6)               | 11.1 ( 15.4)             | 0.604   |
| $\Delta$ %Time > 180 mg/dL             | -4.1 ( 11.4)              | -10.5 ( 17.7)            | 0.720   |
| $\Delta$ %Time > 250 mg/dL             | -2.7 ( 2.0)               | -1.7 ( 4.3)              | 0.549   |
| $\Delta$ %Time > 300 mg/dL             | -1.0 ( 1.6)               | -0.2 ( 1.6)              | 0.278   |
| $\Delta$ Mean glucose (mg/dL)          | -7.6 ( 10.7)              | -10.7 ( 19.5)            | 0.720   |
| $\Delta$ Median glucose (mg/dL)        | -6.1 ( 14.3)              | -12.8 ( 24.2)            | 0.842   |
| $\Delta$ SD glucose (mg/dL)            | -4.8 ( 16.7)              | -4.9 ( 10.0)             | 0.968   |
| $\Delta$ CV glucose                    | -0.0 ( 0.1)               | -0.0 ( 0.1)              | 1.000   |
| $\Delta$ Mean glucose at 06:00 (mg/dL) | -24.2 ( 38.2)             | -17.0 ( 28.8)            | 0.400   |

## SUPPLEMENTARY DATA

**Supplementary Figure 1.** Flowchart of clinical trial plan.

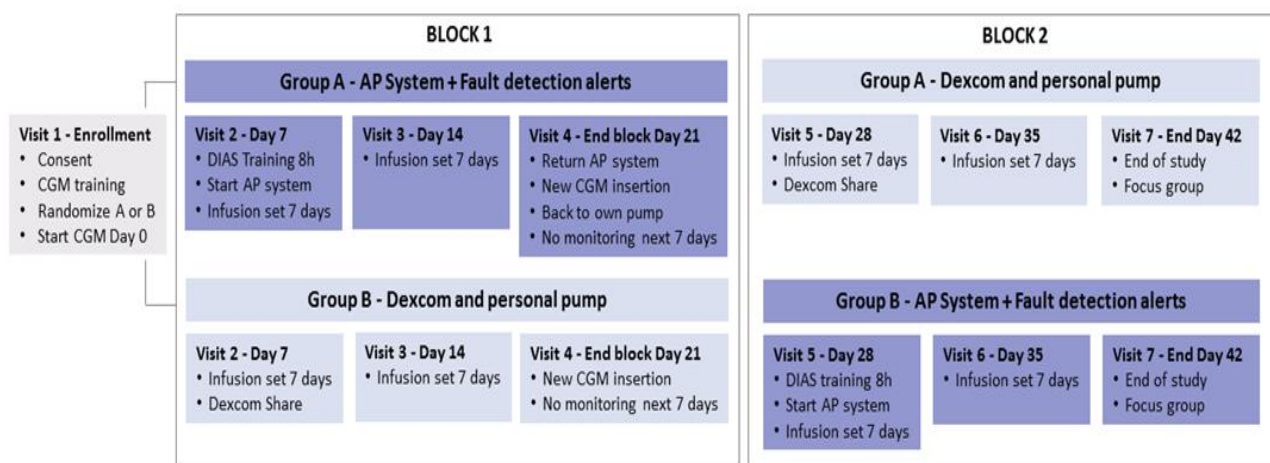

# SUPPLEMENTARY DATA

**Supplementary Figure 2.** Analysis on relationship between changes in time in 70-180 mg/dL, from Zone-MPC AP to SAP, and percent time closed-loop was active for responders (A) vs non-responders (B). For responders, the percent time in closed-loop is strongly correlated (sub-figure A,  $R^2 = 0.49$ ,  $\beta_1 = 1.78$  ( $p = 0.007$ ), 95% CI = [0.57 2.99]) with the outcome whereas completely unrelated (sub-figure B,  $R^2 = 0.02$ ,  $\beta_1 = -0.12$  ( $p = 0.78$ ), 95% CI = [-1.28 1.03]) for non-responders

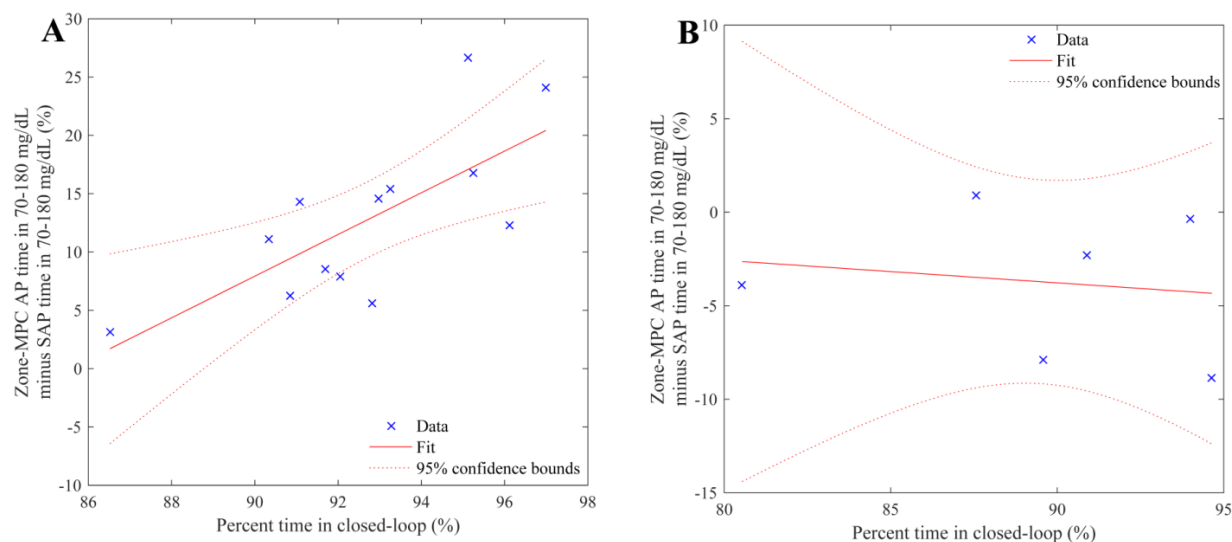

## SUPPLEMENTARY DATA

**Supplementary Figure 3.** Analysis on relationship between time < 70 mg/dL and time > 180 mg/dL changes, from Zone-MPC AP to SAP, and percent time closed-loop was active. For change in percent time < 70 mg/dL (sub-figure A,  $R^2 = 0.000975$ ,  $\beta_1 = 0.01$  ( $p = 0.9$ ), 95% CI =  $[-0.17 \ 0.19]$ ), there was no correlation with percent time in closed-loop as subjects spent very small amount of time in hypoglycemia. For change in percent time > 180 mg/dL (sub-figure B,  $R^2 = 0.31$ ,  $\beta_1 = -1.53$  ( $p = 0.014$ ), 95% CI =  $[-2.72 \ -0.34]$ ), the time spent in closed-loop correlates with decrease in hyperglycemia.

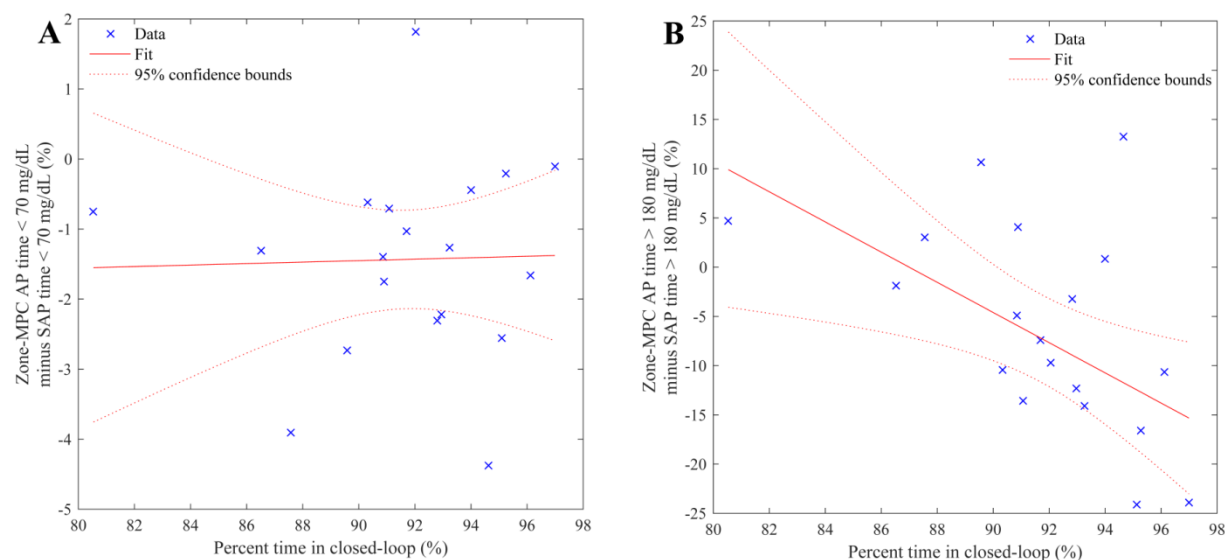

Supplement: dc170500supplementarydata.pdf [file dc170500supplementarydata.pdf]
